# Supplementary material for: Microglial activation increases cocaine self-administration following adolescent nicotine exposure
Source: PubMed Central journal article supplement (PMC6965638; doi:10.1038/s41467-019-14173-3), 2020-01-16
Supplement: 41467_2019_14173_MOESM1_ESM.pdf [file 41467_2019_14173_MOESM1_ESM.pdf]

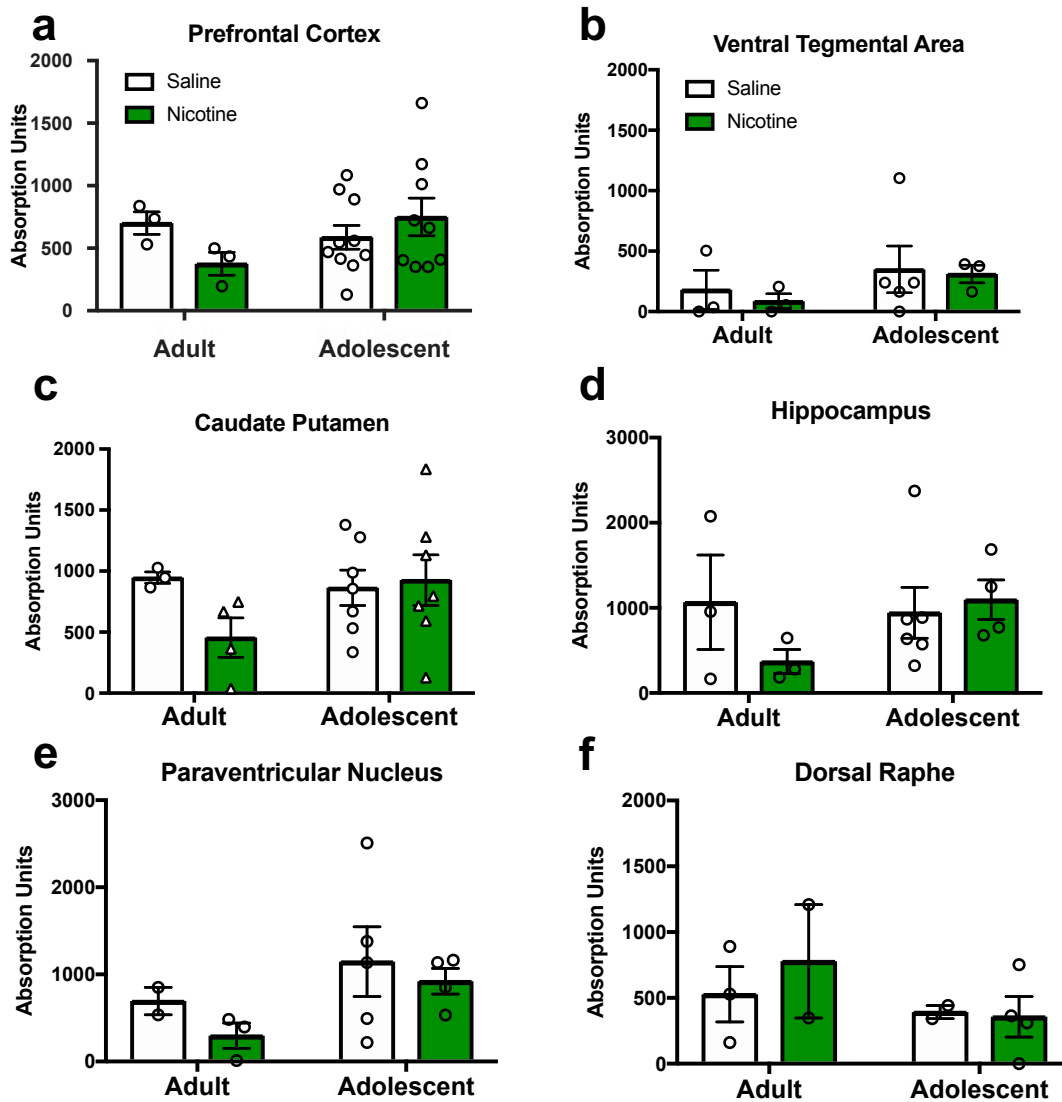

**Supplementary Fig. 1:** Evaluation of nicotine induced changes to IBA1 throughout the brain. **a**, Nicotine did not change PFC IBA1 expression ( $F(1,21)= 0.2478$ ,  $p=0.6238$ ;  $\eta^2=1.305\%$ ;  $n=3-9$ ). **b**, Nicotine did not alter VTA IBA1 expression ( $F(1,10)= 0.1524$ ,  $p=0.7044$ ;  $\eta^2=1.312\%$ ;  $n=4-5$ ). **c**, Nicotine did not significantly affect dorsal striatum IBA1 expression ( $F(1,17)=1.194$ ,  $p=0.2899$ ;  $\eta^2=5.738\%$ ;  $n=3-7$ ). **d**, Nicotine did not significantly affect hippocampal IBA1 expression ( $F(1,12)=0.6186$ ,  $p=0.4468$ ;  $\eta^2=4.272\%$ ;  $n=3-6$ ). **e**, Nicotine did not alter paraventricular nucleus IBA1 expression ( $F(1,10)=0.8307$ ,  $p=0.3835$ ;  $\eta^2=5.967\%$ ;  $n=2-5$ ). **f**, Nicotine had no effect on dorsal raphe IBA1 expression ( $F(1,7)=0.2214$ ,  $p=0.6523$ ;  $\eta^2=2.469\%$ ;  $n=2-4$ ). Data analyzed with a two-way ANOVA. Bars represent mean +/- s.e.m.

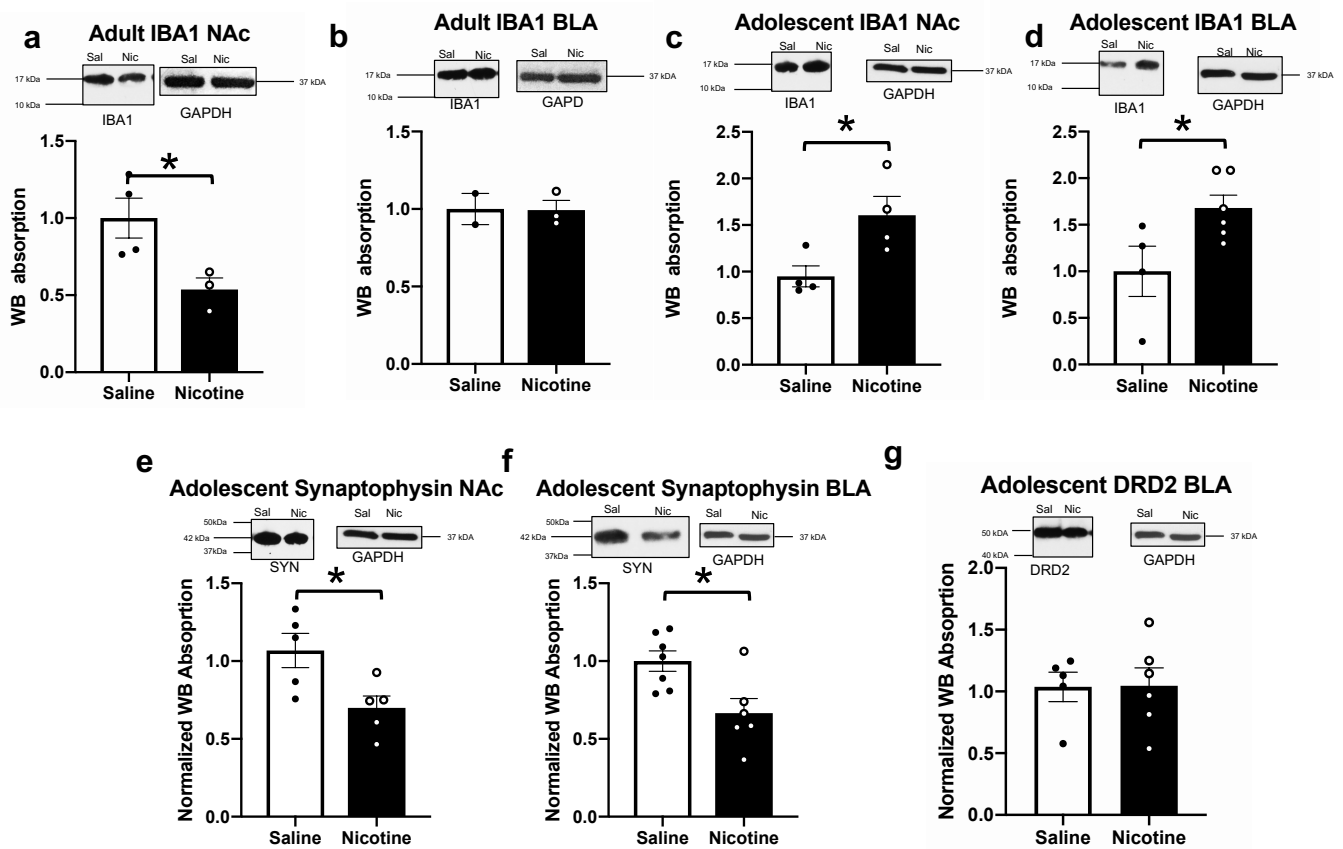

**Supplementary Fig. 2:** Verification of immunohistochemistry data with western blot analysis. **a**, Western blot analysis of IBA1 expression in adult NAc, showed significant decreases in IBA1 protein ( $t_5=2.793$ ,  $p=0.0383$ ) ( $n=4$  saline, 3 nicotine). **b**, Nicotine did not affect adult BLA IBA1 protein levels ( $t_3=0.06335$ ,  $p=0.9535$ ) ( $n=2$  saline, 3 nicotine). **c**, Adolescent nicotine exposure increased NAc IBA1 protein expression ( $t_6=2.834$ ,  $p=0.0298$ ) ( $n=4$ ) and **(d)** BLA IBA1 protein expression ( $t_8=2.477$ ,  $p=0.0383$ ) ( $n=4$  saline, 6 nicotine). **e**, Adolescent nicotine exposure decreased NAc synaptophysin protein ( $t_8=2.749$ ,  $p=0.0251$ ) ( $n=5$ ) and **(f)** BLA synaptophysin protein ( $t_{11}=2.989$ ,  $p=0.0123$ ) ( $n=7$  saline, 6 nicotine). **g**, Adolescent nicotine exposure did not alter BLA DRD2 protein levels BLA ( $t_9=0.0448$ ,  $p=0.9652$ ) ( $n=5$  saline, 6 nicotine). Data analyzed with a t-test (\* $p<0.05$ , \*\* $p<0.01$ , \*\*\* $p<0.001$ , \*\*\*\* $p<0.0001$ ). Bars show mean  $\pm$  s.e.m.

## NAC

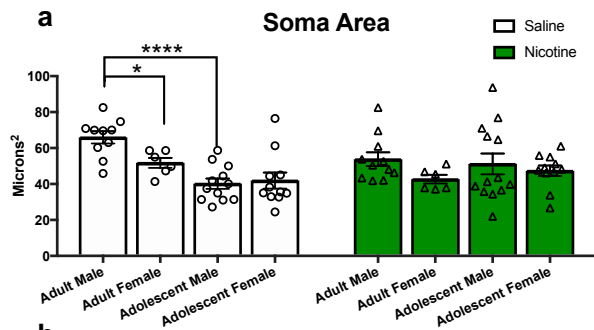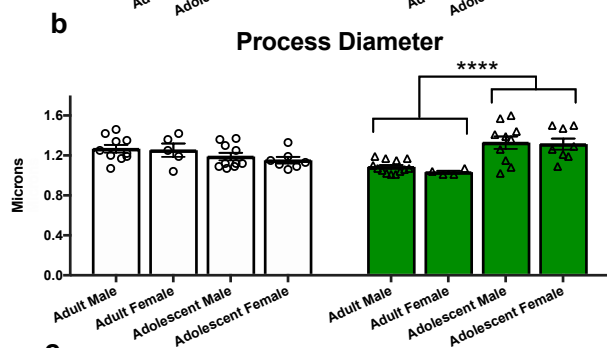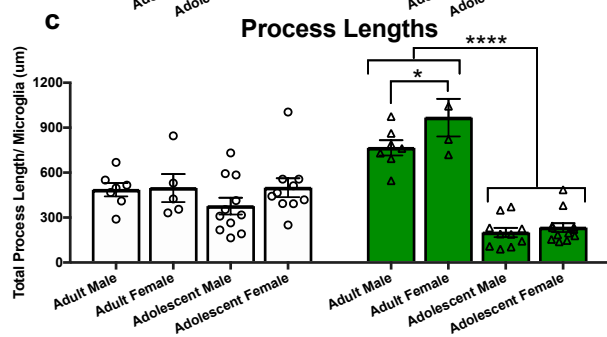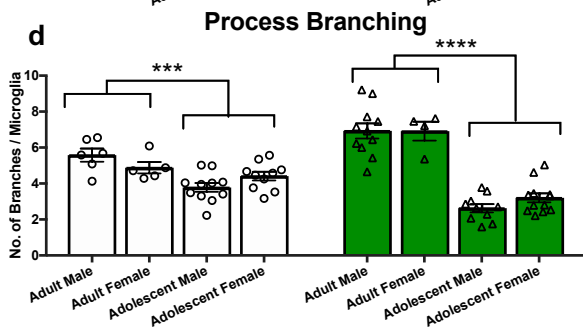

## BLA

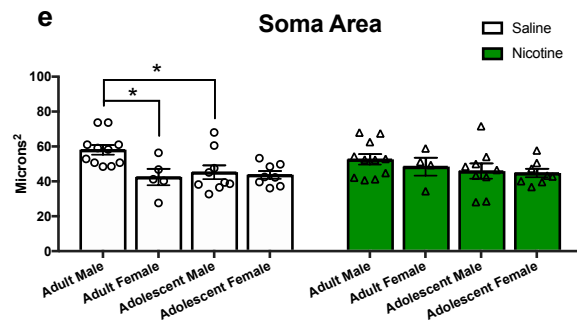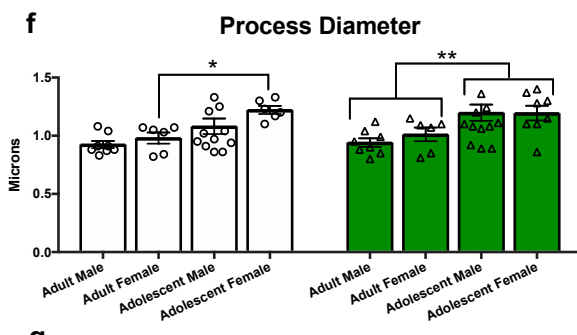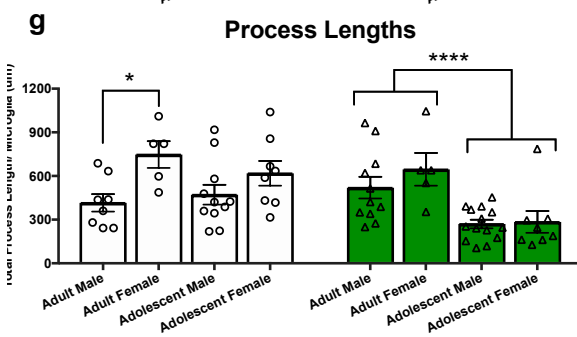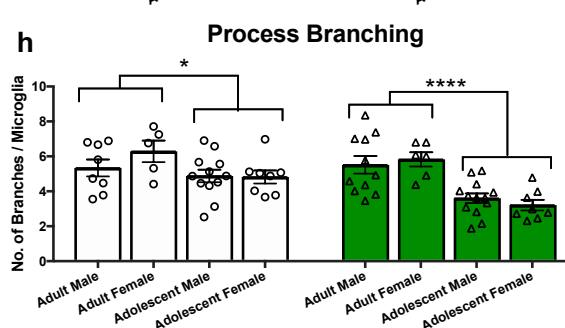

**Supplementary Fig. 3:** Comparison of adult and adolescent microglial morphology **a**, Saline treated adolescent rats and adult female rats had significantly smaller NAc soma compared to adult male rats ( $F(1,35)=22.04$ ,  $p<0.0001$ ,  $\eta^2=32.07\%$ ), and there was an interaction between age and sex ( $F(1,35)=4.406$ ,  $p=0.431$ ;  $\eta^2=6.409\%$ ). Nicotine had no differential effect on soma size in either age or sex ( $n=6-13$ ). **b**, Baseline NAc process diameter was not significantly different in either age or sex. Nicotine significantly increased adolescent rat process diameter as compared to adult ( $F(1,31)=26.81$ ,  $p<0.0001$ ;  $\eta^2=44.19\%$ ) ( $n=4-14$ ). **c**, Baseline NAc process lengths were consistent across age and sex. Nicotine exposed female rats had longer process lengths compared to male ( $F(1,29) = 5.567$ ,  $p=0.252$ ;  $\eta^2=2.79\%$ ), and nicotine treated adolescent rats had short process lengths than adult ( $F(1,29)=170.3$ ,  $p<0.0001$ ;  $\eta^2=85.34\%$ ) ( $n=4-14$ ). **d**, Saline treated adults had more NAc process branching than adolescent ( $F(1,28)=14.43$ ,  $p=0.0007$ ,  $\eta^2=29.41\%$ ) and there was a significant interaction between age and sex ( $F(1,28)= 4.956$ ,  $p=0.0342$ ,  $\eta^2=10.1\%$ ). Nicotine treated adolescent rats had lower branching than adult ( $F(1,33)=112.6$ ,  $p<0.0001$ ;  $\eta^2=68.33\%$ ) ( $n=4-14$ ). **e**, Saline treated adolescent and adult female BLA microglia were smaller than adult male microglia ( $F(1,29)=6.076$ ,  $p=0.199$ ,  $\eta^2=13.5\%$ ), and there was a significant interaction between age and sex ( $F(1,29)=4.096$ ,  $p=0.0523$ ;  $\eta^2=9.1\%$ ). **f**, Adolescent rats had larger baseline process diameters in the BLA as compared to males ( $F(1,28)=10.91$ ,  $p=0.0026$ ,  $\eta^2=26.73\%$ ). Nicotine treated adolescent rats had thicker processes than adults ( $F(1,32)= 9.838$ ,  $p=0.0037$ ;  $\eta^2=22.77\%$ ) ( $n=6-14$ ) **g**, Adult female saline treated rats had longer BLA process lengths than male ( $F(1,28)=9.297$ ,  $p=0.0050$ ;  $\eta^2=24.7\%$ ). Adult nicotine rats had longer process lengths than adolescent ( $F(1,34)=19.48$ ,  $p<0.0001$ ;  $\eta^2=35.81\%$ ) ( $n=6-14$ ). **h**, Adolescent rats had lower baseline BLA branching ( $F(1,29)=4.376$ ,  $p=0.0453$ ;  $\eta^2=12.75\%$ ). Nicotine treated adolescents had higher branching compared to adults ( $F(1,34)=30.6$ ,  $p<0.0001$ ;  $\eta^2=46.96\%$ ) ( $n=6-14$ ). Data analyzed with a two-way ANOVA and subsequently analyzed with Bonferroni post hoc analysis (\* $p<0.05$ , \*\* $p<0.01$ , \*\*\* $p<0.0001$ , \*\*\*\* $p<0.00001$ ). Bars show mean +/- s.e.m.



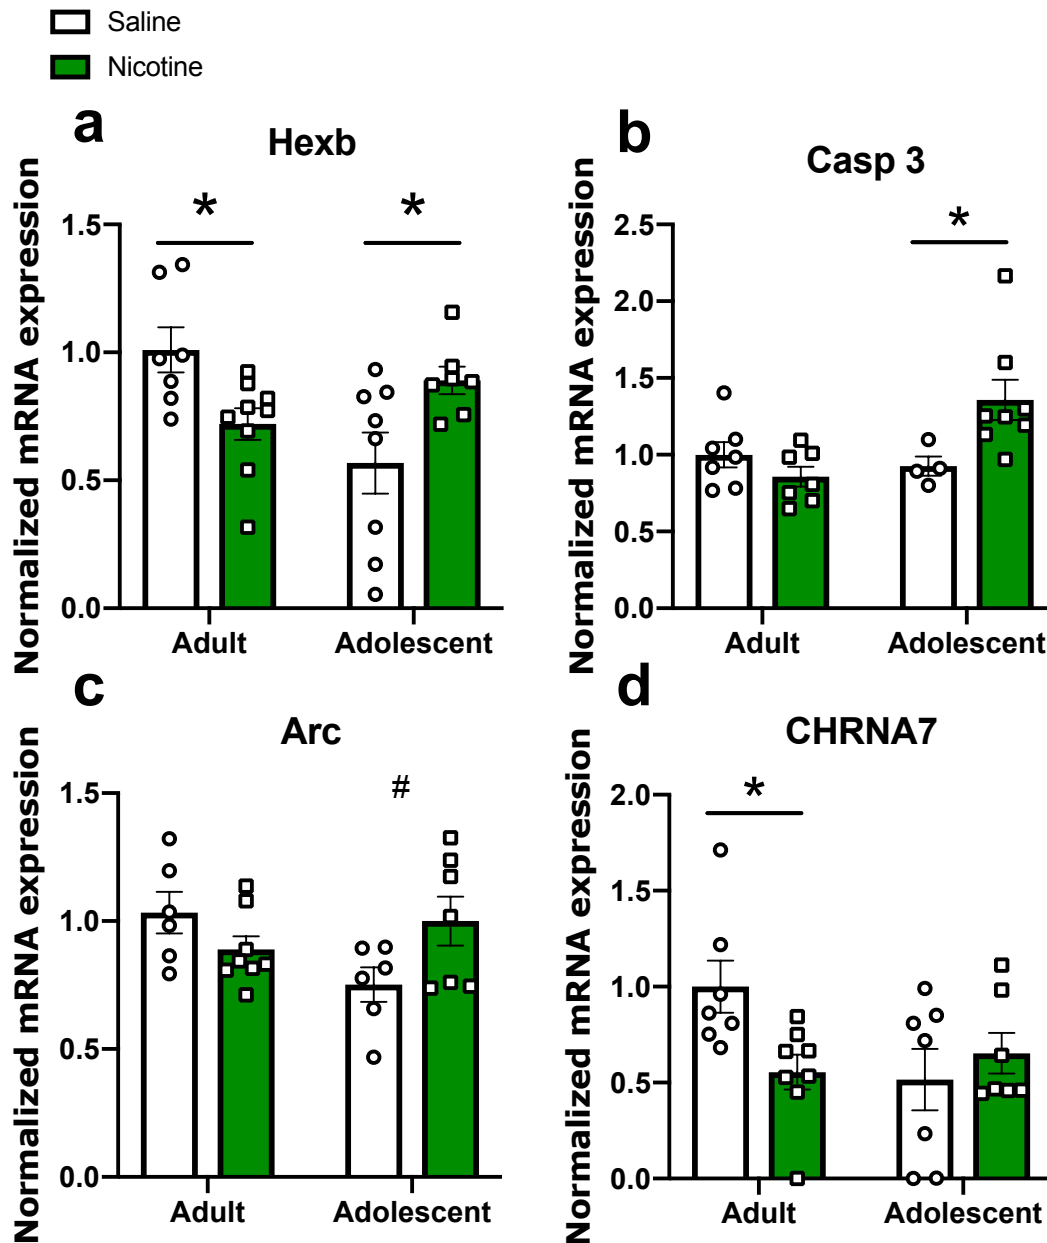

**Supplementary Fig. 4:** Verification of select Nanostring differentially expressed genes within the NAc with qPCR analysis. **a**, Nicotine significantly decreased adult Hexb expression, but increased adolescent ( $F(1, 27)=12.71, p=0.0014$ ) ( $n=7$  adult saline, 9 adult nicotine, 8 adolescent saline, 7 adolescent nicotine). **b**, Nicotine significantly increased adolescent Casp3 mRNA ( $F(1, 22)=7.459, p=0.0122$ ) ( $n=7$  adult saline, 7 adult nicotine, 4 adolescent saline, 8 adolescent nicotine). **c**, Nicotine increased adolescent Arc mRNA expression with a significant interaction between age and nicotine pretreatment ( $F(1, 23)=6.774, p=0.0159$ ) ( $n=6$  adult saline, 8 adult nicotine, 6 adolescent saline, 7 adolescent nicotine). **d**, Nicotine significantly decreased adult CHRNA7 mRNA expression ( $F(1, 25)=5.507, p=0.0272$ ) ( $n=7$  adult saline, 8 adult nicotine, 7 adolescent saline, 7 adolescent nicotine). Data analyzed with a two-way ANOVA and Bonferroni post hoc tests (\* $p<0.05$ , \*\* $p<0.01$ ; # $p=0.0606$ ). Bars show mean  $\pm$  s.e.m.

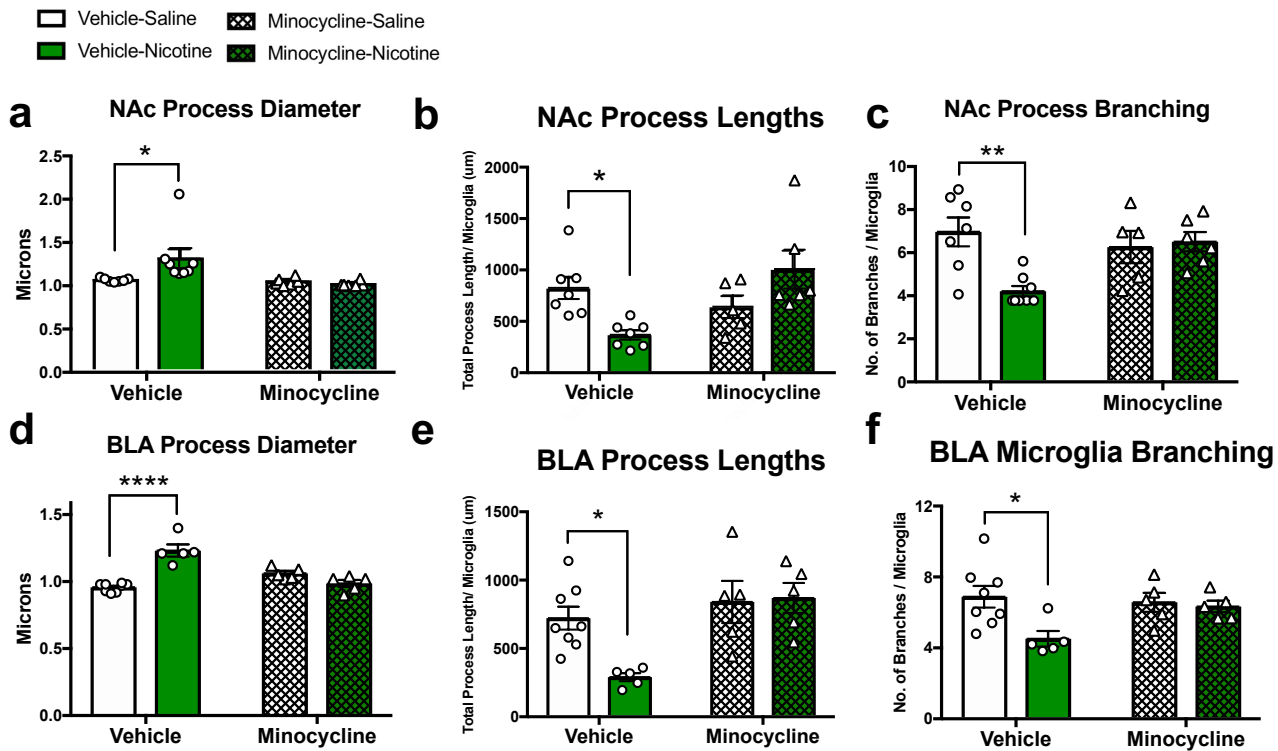

**Supplementary Fig. 5: Minocycline blocks nicotine-induced microglia activation.** **a**, Nicotine increased NAc diameter ( $F(1,23)=4.299$ ,  $p=0.0495$ ;  $\eta^2=14.8\%$ ), and this was blocked with minocycline ( $F(1,23)=5.447$ ,  $p=0.0287$ ;  $\eta^2=11.68\%$ ) ( $n=6-8$ ). **b**, Nicotine decreased NAc process lengths, and minocycline blocked this increase ( $F(1,21)=11.49$ ,  $p=0.0028$ ;  $\eta^2=30.87$ ) ( $n=5-7$ ). **c**, Nicotine decreased NAc microglial branching ( $F(1,22)=5.532$ ,  $p=0.0280$ ;  $\eta^2=13.57\%$ ), and minocycline blocked this decrease ( $F(1,22)=7.935$ ,  $p=0.0100$ ;  $\eta^2=19.46\%$ ) ( $n=5-8$ ). **d**, Nicotine increased BLA microglial diameter ( $F(1,19)=14.75$ ,  $p=0.0011$ ;  $\eta^2=16.73\%$ ) and minocycline blocked this increase ( $F(1,19)=7.493$ ,  $p=0.0131$ ;  $\eta^2=8.499\%$ ). There was an interaction between nicotine and minocycline ( $F(1,19)=45.97$ ,  $p<0.0001$ ;  $\eta^2=52.15\%$ ) ( $n=5-8$ ). **e**, Minocycline blocked nicotine-induced decreases in BLA process lengths ( $F(1,19)=11.31$ ,  $p=0.0033$ ;  $\eta^2=30.4\%$ ). There was an interaction between nicotine and minocycline ( $F(1,19)=4.937$ ,  $p=0.0386$ ;  $\eta^2=13.26\%$ ) ( $n=5-8$ ). **f**, Nicotine decreased BLA process branching ( $F(1,19)=5.446$ ,  $p=0.0307$ ;  $\eta^2=18.21\%$ ) and this blocked with minocycline administration ( $n=5-8$ ). Data analyzed with a two-way ANOVA and subsequently analyzed with Bonferroni post hoc analysis (\* $p<0.05$ , \*\* $p<0.01$ , \*\*\* $p<0.0001$ , \*\*\*\* $p<0.00001$ ). Bars show mean  $\pm$  s.e.m.

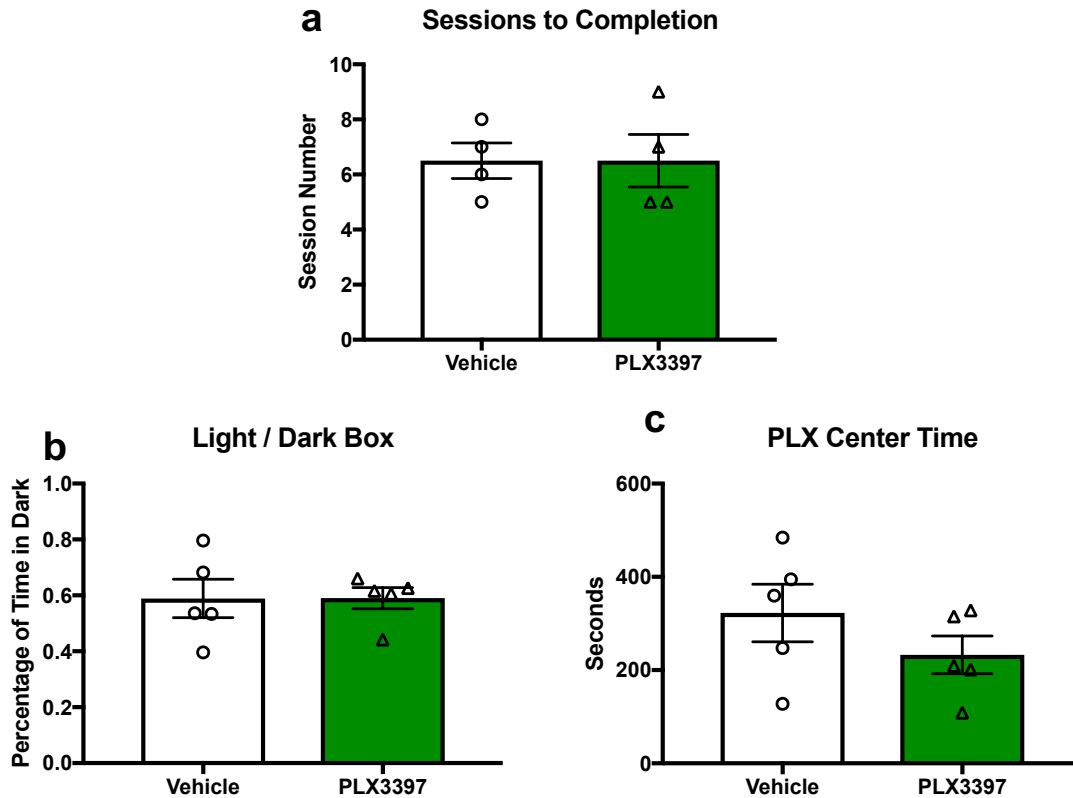

**Supplementary Fig. 6:** PLX3397 does not affect reward or stress behaviors. PLX3397 was administered at least 7 days prior to each behavioral test to ensure clearance of microglia (see Fig. 4). PLX3397 did not alter stress or reward behaviors measured. **a**, PLX3397 chow administration did alter food training acquisition. PLX3397 did not alter number of sessions to completion of the food-training paradigm ( $t_6=0$ ,  $p>0.9999$ ;  $n=4$ ;  $r^2=0$ ). **b**, PLX3397 did not affect light dark box performance ( $t_8=0.01526$ ,  $p=0.9882$ ;  $n=5$ ;  $r^2=2.912e^{-005}$ ). **c**, PLX3397 did not significantly change rat center time  $t_8=1.22$ ,  $p=0.2573$ ;  $n=5$ ;  $r^2=1.568$ ). Data analyzed with t-tests.

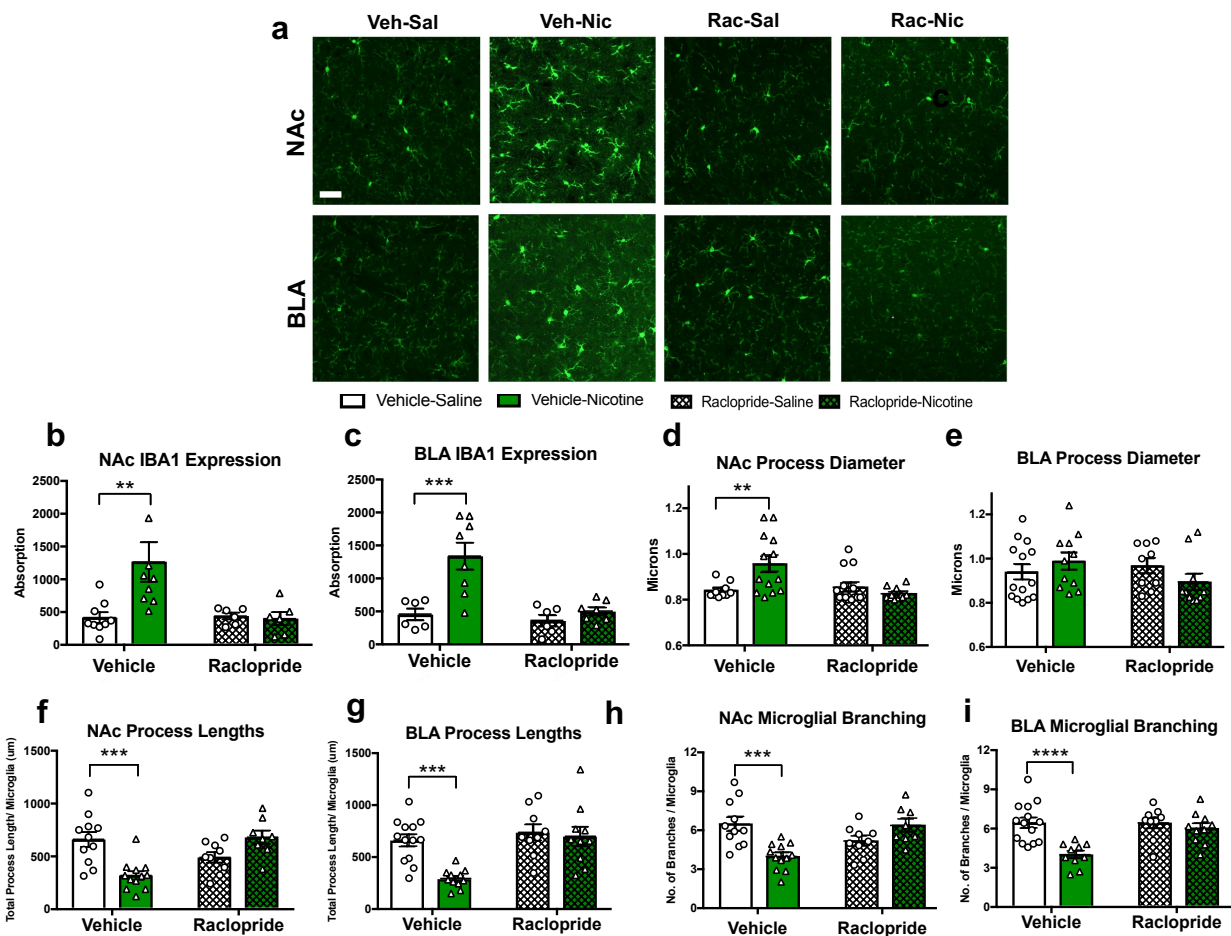

**Supplementary Fig. 7:** Raclopride blocks nicotine-induced microglial activation. **a**, Representative image of IBA1 stained cells with +/-nicotine and +/- raclopride. **b**, Nicotine significantly increased NAc IBA1 expression ( $F(1,26)=4.154$ ,  $p=0.0518$ ;  $\eta^2=9.914\%$ ) and this was blocked with raclopride administration ( $F(1,26)=4.479$ ,  $p=0.0440$ ;  $\eta^2=10.62\%$ ). We observed a significant interaction between nicotine and raclopride ( $F(1,26)=4.991$ ,  $p=0.0343$ ;  $\eta^2=11.91\%$ ) ( $n=9$  vehicle-saline/nicotine, 6 raclopride-saline/nicotine). **c**, Nicotine significantly increased BLA IBA1 expression ( $F(1,23)=13.79$ ,  $p=0.0011$ ;  $\eta^2=23.32\%$ ) and raclopride eliminated this increase ( $F(1,23)=7.185$ ,  $p=0.0134$ ;  $\eta^2=19.25\%$ ) ( $n=6$  vehicle-saline, 8 vehicle-nicotine, 6 raclopride-saline, 7 raclopride-nicotine). **d**, Raclopride blocks nicotine-induced increases adolescent NAc process diameter ( $F(1,44)=6.051$ ,  $p=0.0179$ ;  $\eta^2=9.473\%$ ). A significant interaction between raclopride and nicotine ( $F(1,44)=9.377$ ,  $p=0.0037$ ;  $\eta^2=14.68\%$ ) was found ( $n=11$  vehicle-saline, 14 vehicle-nicotine, 14 raclopride-saline, 11 raclopride-nicotine). **e**, No significant effects of raclopride or nicotine were found in the BLA process diameter ( $n=14$  vehicle-saline, 11 vehicle-nicotine, 9 raclopride-saline, 10 raclopride-nicotine). **f**, Nicotine exposure decreased adolescent NAc microglial process lengths and raclopride blocked this decrease ( $F(1,36)=21.54$ ,  $p<0.0001$ ;  $\eta^2=33.35\%$ ;  $n=11$  vehicle-saline, 12 vehicle-nicotine, 9 raclopride-saline, 8 raclopride-nicotine). **g**, Raclopride blocks nicotine-induced decreases adolescent BLA microglial process lengths. We observed a significant effect of nicotine ( $F(1,39)=9.432$ ,  $p=0.0039$ ;  $\eta^2=13.84$ ), raclopride ( $F(1,39)=13.19$ ,  $p=0.0008$ ;  $\eta^2=19.35\%$ ) and interaction between nicotine and raclopride ( $F(1,39)=6.24$ ,  $p=0.0168$ ;  $\eta^2=9.155$ ) ( $n=13$  vehicle-saline, 11 vehicle-nicotine, 9 raclopride-saline, 10 raclopride-nicotine). **h**, Raclopride blocked nicotine-induced decreases in NAc microglial branching ( $F(1,36)=17.47$ ,  $p=0.0002$ ,  $\eta^2=29.31$ ;  $n=11$  vehicle-saline, 12 vehicle-nicotine, 9 raclopride-saline, 8 raclopride-nicotine). **i**, Raclopride blocked decreases adolescent BLA microglial branching after nicotine exposure. There was a significant effect of nicotine ( $F(1,39)=13.08$ ,  $p=0.0008$ ;  $\eta^2=13.84$ ), raclopride ( $F(1,39)=6.564$ ,  $p=0.0144$ ;  $\eta^2=19.35$ ), and interaction between nicotine and raclopride ( $F(1,39)=6.609$ ,  $p=0.0141$ ;  $\eta^2=9.155$ ) ( $n=14$  vehicle-saline, 10 vehicle-nicotine, 9 raclopride-saline, 10 raclopride-nicotine). All data analyzed with a two-way ANOVA, both Bonferonni post hoc analysis ( $*p<0.05$ ,  $**p<0.01$ ,  $***p<0.001$ ,  $****p<0.0001$ ). Scale bar is  $50\mu\text{m}$ . Bars show mean  $\pm$  s.e.m.

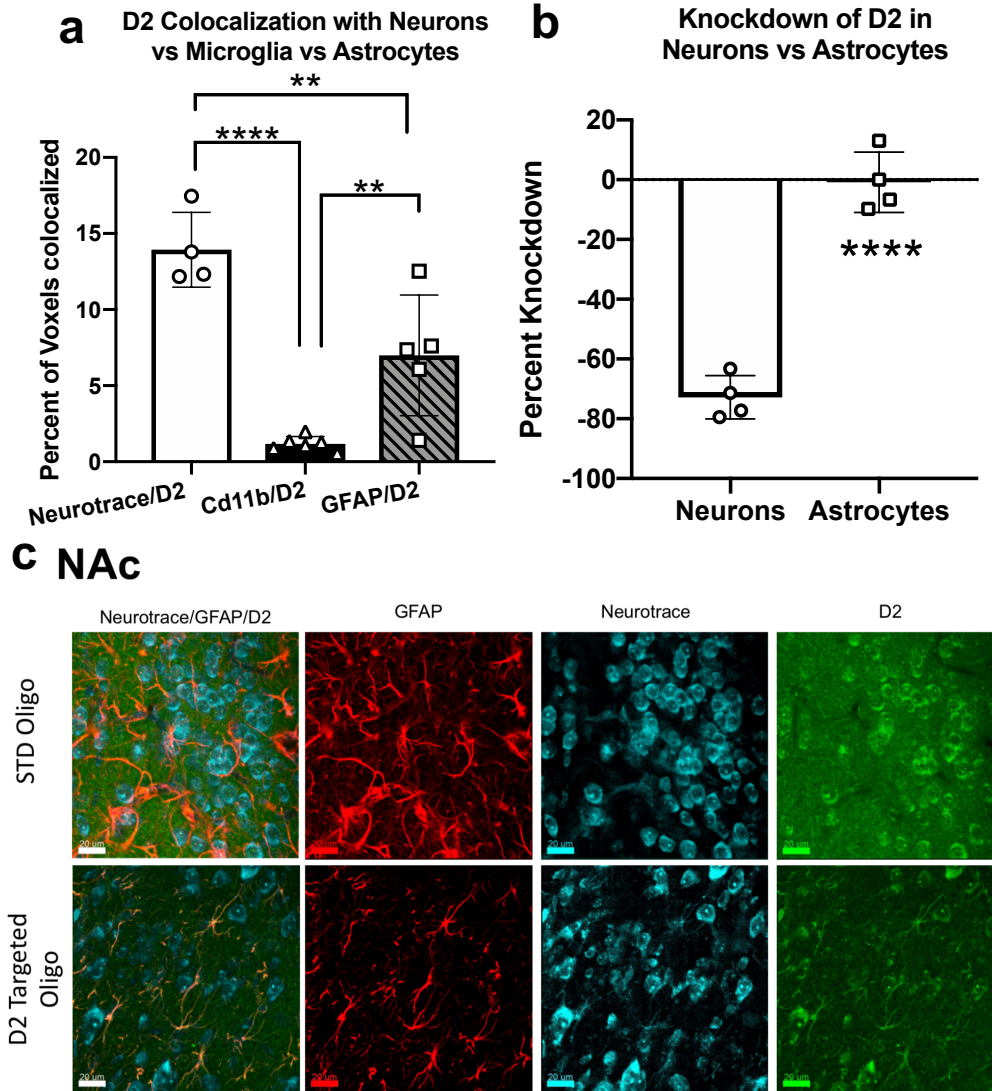

**Supplementary Fig. 8:** Percent knockdown of D2 receptors with morpholino was predominately restricted to neurons. **a**, Percent knockdown determined by (1-Percent decrease in voxels colocalized) compared to sc-oligo treatment. Decrease in voxels colocalized was significantly higher in neurons compared to astrocytes ( $t_6=11.59$ ,  $p<0.0001$ ,  $n=4$ ) **b**, Representative immunohistochemistry images of colocalization between Neurotrace, GFAP, and D2. Data analyzed with a two-way ANOVA and Bonferroni post hoc tests ( $*p<0.05$ ,  $**p<0.01$ ,  $***p<0.001$ ,  $****p<0.0001$ ). **c**, Representative images of immunohistochemistry data shown in panel a. D2 targeted morpholino preferentially depletes D2 receptors in neurons. Scale bar is 20  $\mu\text{m}$ . Bars show mean  $\pm$  s.e.m.

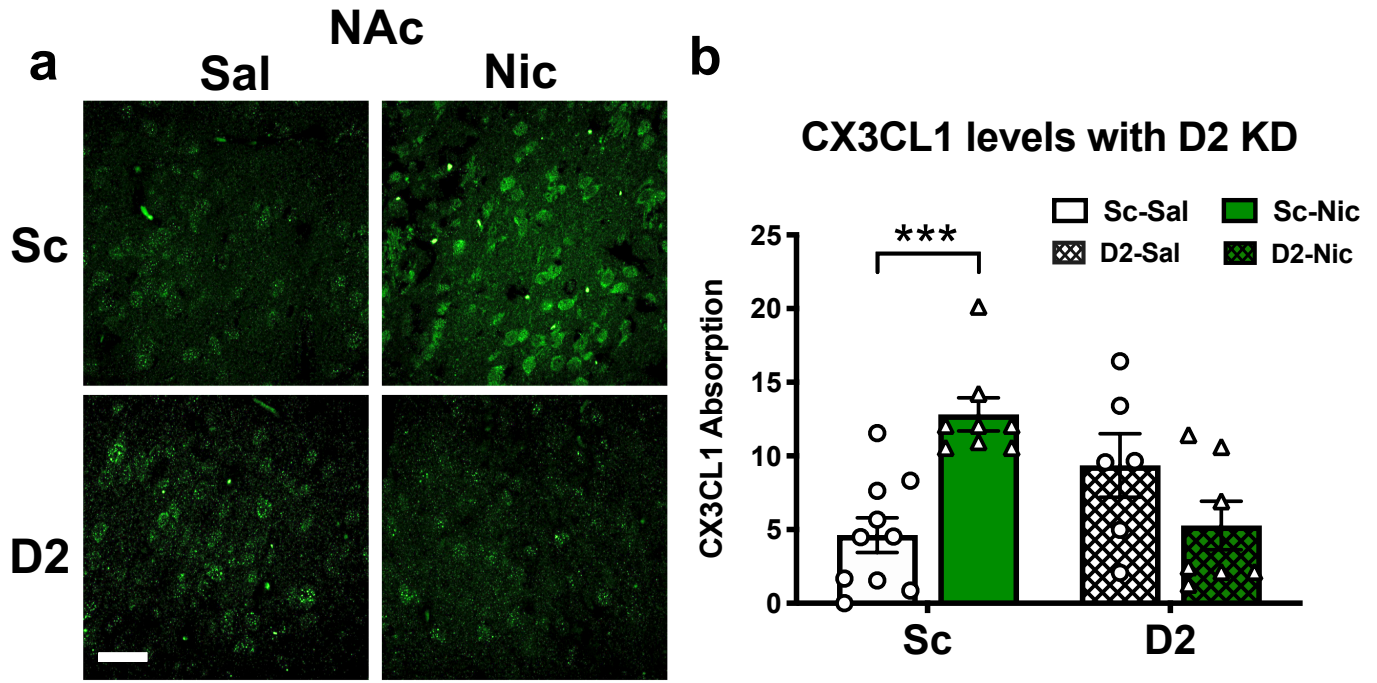

**Supplementary Fig. 9:** Nicotine increases CX3CL1 levels and this is blocked by DRD2 targeted morpholino. **a**, Representative images of CX3CL1 in the NAc with and without nicotine and with a scrambled or DRD2 targeted morpholino. **b**, CX3CL1 is increased after nicotine exposure, and this is blocked with DRD2 knockdown, a significant interaction between CX3CL1 and nicotine ( $F(1, 27) = 16.98$ ,  $p=0.0003$ ,  $\eta^2=34.80$ ,  $n=6-10$ ). Data analyzed with a two-way ANOVA and Bonferroni post hoc tests (\*\*\*\* $p<0.0001$ ). Scale bar is 20  $\mu\text{m}$ . Bars show mean  $\pm$  s.e.m.



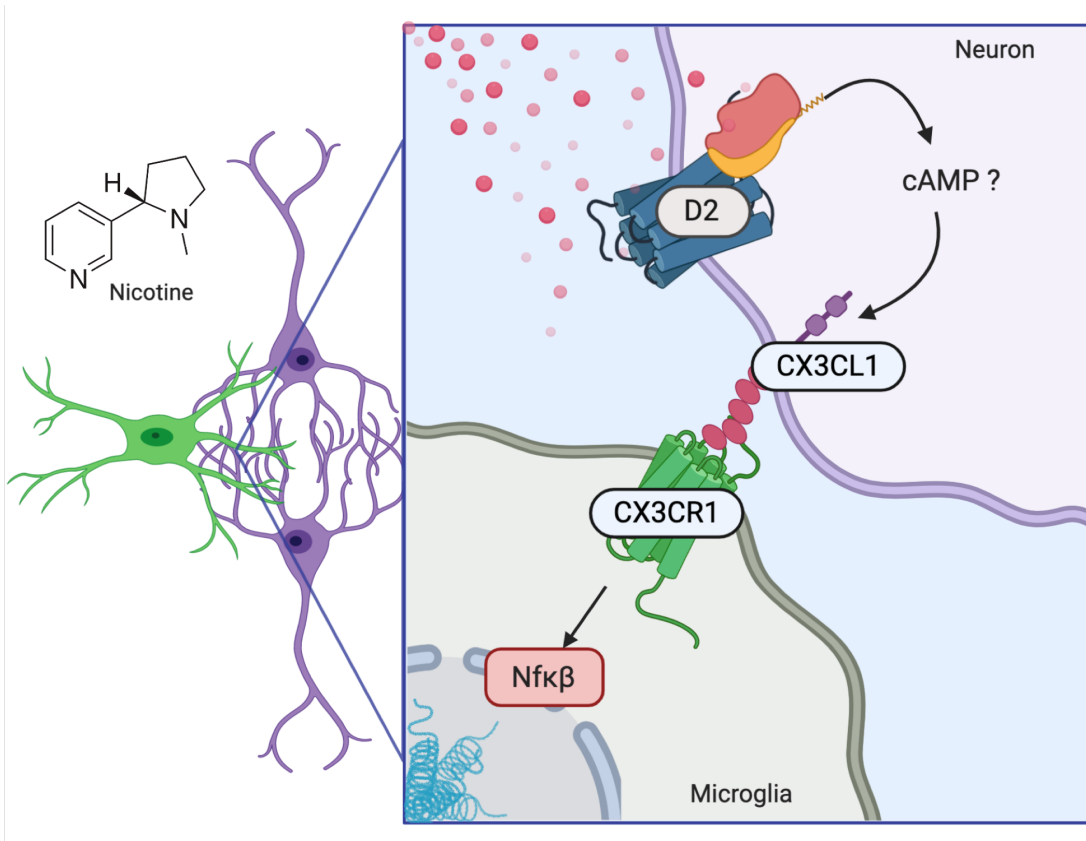

**Supplementary Fig. 10:** Schematic of proposed mechanism for nicotine-induced changes to adolescent microglia. Adolescents express functionally immature dopamine receptors that increase in expression after nicotine exposure. Nicotine generates a cascade of signaling events, to increase CX3CL1 via neuronal D2 receptors. CX3CL1 binds to the microglia exclusive receptor CX3CR1 to induce microglial activation.

**IBA1 Western Blot**

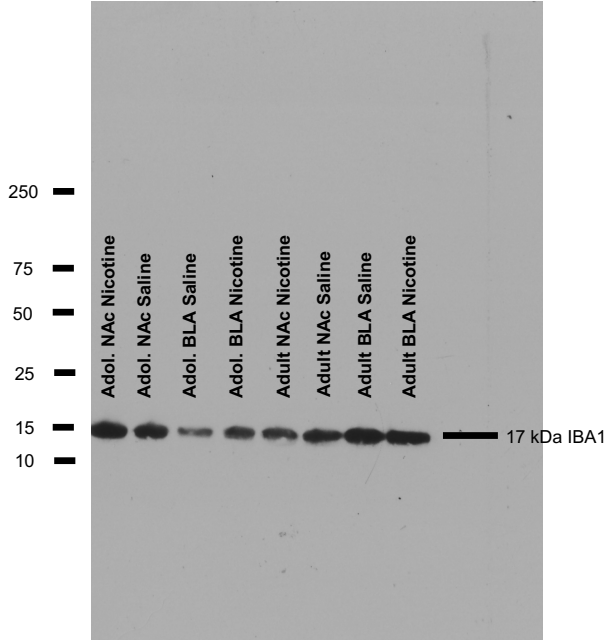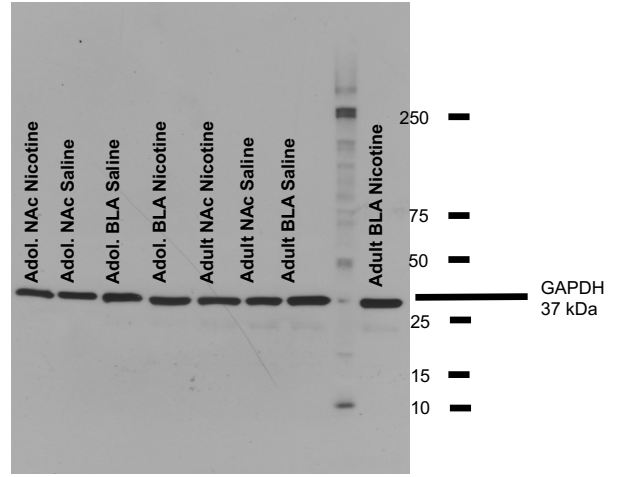

**Synaptophysin Western Blot**

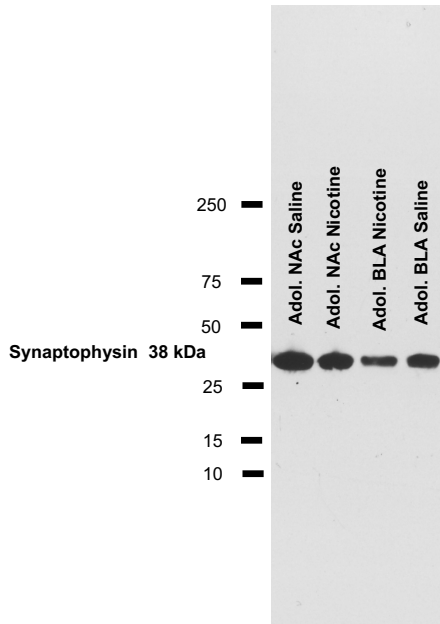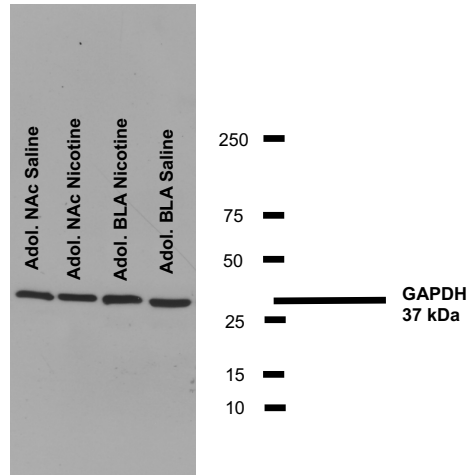



DRD2 Western Blot

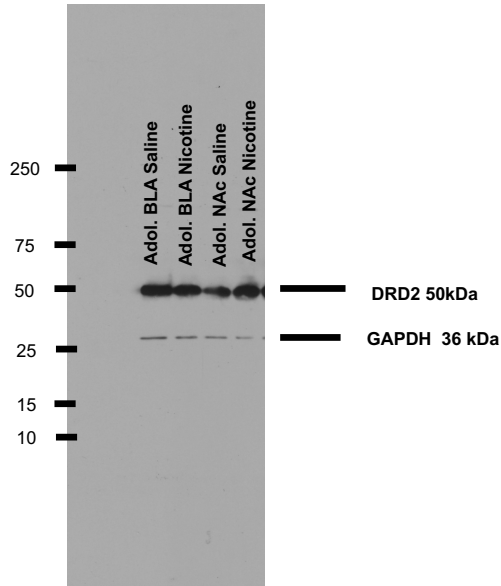

**Supplementary Fig. 11:** Representative full western blots with markers for IBA1, DRD2 and synaptophysin. Analyzed western data shown in supplementary figure 2.
